# Supplementary material for: Improving the Efficacy of Mesenchymal Stem/Stromal-Based Therapy for Treatment of Inflammatory Bowel Diseases
Source: MDPI journal article supplement (doi:10.3390/biomedicines9111507), 2021-10-20
Supplement: s1 [file s1]

**Supplementary Table S5. Completed clinical trials in IBD with systemic MSC-based therapy (listed in chronological order)**

| Clinical Trial Identifier | Clinical Phase | Source   | Registration year | Country         | IBD patients                               | MHC context | Route of administration | Cells/kg of Body Weight; Number of Doses                                                                                                                 | Number of IBD Patients Enrolled | Follow-Up (Months) | Publication (Year) | Included Control Group | Age range (years) |
|---------------------------|----------------|----------|-------------------|-----------------|--------------------------------------------|-------------|-------------------------|----------------------------------------------------------------------------------------------------------------------------------------------------------|---------------------------------|--------------------|--------------------|------------------------|-------------------|
| NCT00294112               | II             | BM       | 2006              | USA             | Refractory CD patients                     | Allogeneic  | IV                      | -2x10 <sup>6</sup> /Kg, 2 doses =4 x 10 <sup>6</sup><br>-8x10 <sup>6</sup> /Kg, 2 doses=16 x 10 <sup>6</sup> weekly                                      | 10                              | 1 month            | Not published      | No                     | 18-70             |
| NCT00543374               | III            | BM       | 2007              | USA             | Refractory CD patients                     | Allogeneic  | IV                      | -6 x 10 <sup>8</sup> cells, in 4 doses in two weeks<br>-12 x 10 <sup>8</sup> cell in 4 doses in two weeks                                                | 98                              | 6 months           | Not published      | Yes                    | 18-70             |
| NCT00482092               | III            | BM       | 2007              | USA             | Refractory CD patients                     | Allogeneic  | IV                      | -6 x 10 <sup>8</sup> cells, in 4 doses in two weeks<br>-12 x 10 <sup>8</sup> cell in 4 doses in two weeks                                                | 330                             | 1 month            | Not published      | Yes                    | 18-70             |
| NTR1360                   | I              | BM       | 2008              | The Netherlands | Refractory CD patients                     | Autologous  | IV                      | 1-2x10 <sup>6</sup> /Kg, 2 doses over two weeks= 2-4x10 <sup>6</sup> /Kg                                                                                 | 10                              | 3.5 months         | 2010 (206)         | No                     | 1-42              |
| NCT01233960               | III            | BM       | 2010              | USA             | Refractory CD patients                     | Allogeneic  | IV                      | -2x10 <sup>8</sup> , 12 doses= 24x10 <sup>8</sup> every 6 weeks                                                                                          | 73                              | 6 months           | Not published      | No                     | 18-70             |
| NCT01090817               | II             | BM       | 2010              | Australia       | Refractory CD patients                     | Allogeneic  | IV                      | 2x10 <sup>6</sup> /Kg, 4 doses weekly=8x10 <sup>6</sup>                                                                                                  | 21                              | 1.5 months         | 2014 (207)         | No                     | 18-55             |
| NCT01155362               | IIa            | Placenta | 2010              | USA             | Refractory CD patients                     | Allogeneic  | IV                      | -1.5x10 <sup>8</sup> , 2 doses=3x10 <sup>8</sup><br>-6x10 <sup>8</sup> , 2 doses, 12x10 <sup>8</sup><br>-12x10 <sup>8</sup> , 2 doses=24x10 <sup>8</sup> | 50                              | 1.5 months         | 2015 (208)         | Yes                    | 18-75             |
| NCT01221428               | I/II           | UC       | 2010              | China           | ASA-treated moderate to severe UC patients | Allogeneic  | IV + IA                 | 2.3–4.7×10 <sup>7</sup> IV & 1.5×10 <sup>7</sup> IA one week later = 40x10 <sup>7</sup>                                                                  | 80                              | 2 years            | 2016 (17)          | Yes                    | 18-70             |
| NCT01540292               | I/II           | BM       | 2012              | Belgium         | Refractory CD patients                     | Allogeneic  | IV                      | 1.5-2x10 <sup>6</sup> /Kg, 2 doses=3-4x10 <sup>6</sup> /Kg                                                                                               | 13                              | 12 months          | 2018 (209)         | No                     | 18-75             |
| NCT01659762               | I              | BM       | 2012              | USA             | Refractory CD patients                     | Autologous  | IV                      | -2x10 <sup>6</sup> /Kg, 1 dose<br>-5x10 <sup>6</sup> /Kg, 1 dose<br>-10x10 <sup>6</sup> /Kg, 1 dose                                                      | 16                              | 3 months           | 2016 (65)          | No                     | 18-65             |
| NCT02150551               | Pilot/I Phase  | BM       | 2015              | USA             | Refractory CD or UC paediatric patients    | Allogeneic  | IV                      | 1x10 <sup>6</sup> /Kg, 4 doses weekly=4x10 <sup>6</sup> /Kg                                                                                              | 1                               | 24 months          | Not published      | No                     | 12-22             |
| NCT02445547               | I/II           | UC       | 2015              | China           | CD patients                                | Allogeneic  | IV                      | 1x10 <sup>6</sup> /Kg, 4 doses= 4x10 <sup>6</sup> /Kg                                                                                                    | 41                              | 12 months          | 2018 (210)         | No                     | 18-70             |
