# Supplementary material for: Improving the Efficacy of Mesenchymal Stem/Stromal-Based Therapy for Treatment of Inflammatory Bowel Diseases
Source: MDPI journal article supplement (doi:10.3390/biomedicines9111507), 2021-10-20
Supplement: s1 [file s1]

**Supplementary Table S4. Mechanisms involved in the therapeutic effects of MSC-based therapy using different molecule-silencing approaches (listed in chronological order)**

| Reference            | Animal model     | Specie, Strain, Gender | MHC context | Source of MSCs | Administration route | MSC Dose          | No. of infusions | Molecule silenced in MSCs                                       | Day of infusion (D) | Parameters analysed for IBD progression                                                                                                                                                                                                                                 | Therapeutic effect of MSC therapy                                 |
|----------------------|------------------|------------------------|-------------|----------------|----------------------|-------------------|------------------|-----------------------------------------------------------------|---------------------|-------------------------------------------------------------------------------------------------------------------------------------------------------------------------------------------------------------------------------------------------------------------------|-------------------------------------------------------------------|
| Akiyama K, 2012 (38) | 10-day DSS cycle | Mouse, C57BL6/J, F     | A           | BM             | IV                   | 1x10 <sup>6</sup> | 1                | -WT MSCs<br>-FASL <sup>-/-</sup> MSCs                           | D3                  | -DAI (Body weight, stool consistency & rectal bleeding)<br>-AnxV <sup>+</sup> 7-AAD <sup>+</sup> CD3 <sup>+</sup> cells (PB)<br>-Th17 & Treg (colon)                                                                                                                    | -Yes, WT MSCs<br>-No, FASL <sup>-/-</sup> MSCs                    |
| An JH, 2020b (43)    | 7-day DSS cycle  | Mouse, C57/BL6, M      | X           | AD             | IP                   | 100 µg            | 3                | -EVs from WT MSCs<br>-EVs from TSG-6 <sup>-/-</sup> MSCs        | D1, D3 & D5         | -DAI (Body weight, stool consistency, rectal bleeding & general activity)<br>-Colon length & H/E staining<br>-Arg, CD11b, CD11c<br>CD206, COX-2, FOXP3, IFNγ, IL6, IL10, IL17, iNOS, TGF-β, TNF-α & TSG-6, (colon)<br>-Body weight, stool consistency & rectal bleeding | -Yes, EVs from WT MSCs<br>-No, EVs from TSG-6 <sup>-/-</sup> MSCs |
| Fan H, 2012 (44)     | 7-day DSS cycle  | Mouse, C57/BL6, M      | X           | UC             | IV                   | 2x10 <sup>6</sup> | 1                | -WT MSCs<br>-IL1β-pretreated MSCs<br>-IL1R1 <sup>-/-</sup> MSCs | D1                  | -Colon length, weight & H/E staining<br>-M1 & M2 macrophages (PC)<br>-Th1, Th2, Th17 & Treg (SP & mLNs)                                                                                                                                                                 | Yes, IL1β-pretreated MSCs>IL1R1 <sup>-/-</sup> MSCs>WT MSCs       |

|                         |                   |                                                           |   |    |    |                   |   |                                                                                       |                              |                                                                                                                                                                               |                                                                                                          |
|-------------------------|-------------------|-----------------------------------------------------------|---|----|----|-------------------|---|---------------------------------------------------------------------------------------|------------------------------|-------------------------------------------------------------------------------------------------------------------------------------------------------------------------------|----------------------------------------------------------------------------------------------------------|
| Feng Y,<br>2018 (50)    | TNBS              | Mouse,<br>BALB/C,<br>M                                    | A | BM | IP | 2x10 <sup>6</sup> | 1 | -WT MSCs<br>-MGP <sup>-/-</sup> MSCs                                                  | 12h                          | -Body weight, stool<br>consistency & survival<br>-Colon length & H/E<br>staining<br>-CD3, CD4, CD8, IFN $\gamma$ ,<br>IL1 $\beta$ , IL6, IL10, IL17 &<br>TNF $\alpha$ (colon) | Yes, WT<br>MSCs>MGP <sup>-/-</sup><br>MSCs                                                               |
| Giri J,<br>2020 (51)    | 6-day DSS cycle   | -Mouse,<br>C57BL6,<br>F<br>-Mouse,<br>IL10 KO,<br>F       | S | BM | IP | 1x10 <sup>7</sup> | 2 | -WT MSCs<br>-IFN $\gamma$ -pretreated MSCs<br>-CCL2 <sup>-/-</sup> MSCs               | D2 &<br>D4                   | -DAI (Body weight)<br>-Colon H/E staining                                                                                                                                     | -Yes, IFN $\gamma$ -<br>pretreated<br>MSCs>WT<br>MSCs<br>-No, CCL2 <sup>-/-</sup><br>MSCs                |
| Kang J,<br>2019 (56)    | 10-day DSS cycle  | Mouse,<br>BALB/C,<br>NA                                   | X | UC | IP | 3x10 <sup>6</sup> | 3 | -WT MSCs<br>-WT MSCs+miR148b-5p<br>inhibitor<br>-WT MSCs+15-lox-1<br>-miR148b-5p-MSCs | D3, D6<br>& D9               | -DAI (Body weight &<br>stool consistency)<br>-Colon length, H/E<br>staining & IHC (PCNA)<br>-caspase 3, IL1 $\beta$ , IL6,<br>15lox1, PCNA, & TNF $\alpha$<br>(colon)         | -Yes, miR148b-<br>5p-MSCs=15-<br>lox-1-WT<br>MSCs=WT<br>MSCs<br>-No, WT<br>MSCs+miR148<br>b-5p inhibitor |
| Liao Y,<br>2016 (48)    | TNBS              | Mouse,<br>C57/BL6,<br>NA                                  | S | BM | IP | 2x10 <sup>6</sup> | 1 | -WT MSCs<br>-IGFBP7 <sup>-/-</sup> MSCs                                               | 12 h                         | -Body weight & survival<br>-Colon length & H/E<br>staining<br>- IFN $\gamma$ & TNF $\alpha$ in CD4 &<br>CD8 T cells (mLN)                                                     | -Yes, WT<br>MSCs<br>-No, IGFBP7 <sup>-/-</sup><br>MSCs                                                   |
| Nemoto Y,<br>2013 (204) | Adoptive transfer | -Mouse,<br>RAG1 KO,<br>NA<br>-Mouse,<br>RAG1 & IL7<br>KO, | S | BM | IV | 1x10 <sup>6</sup> | 1 | -WT MSCs<br>-IL7 <sup>-/-</sup> MSCs                                                  | -D-28<br>-D0<br>-D1 &<br>D28 | -DAI (Body weight, stool<br>consistency & rectal<br>bleeding)<br>-Colon length & H/E<br>staining<br>-IFN $\gamma$ , IL17 & TNF $\alpha$ in                                    | -Yes, WT<br>MSCs<br>-No, IL7 <sup>-/-</sup><br>MSCs                                                      |

|                               |                            |                                    |          |            |                   |                   |          |                                                                                                                                                                                                                                     |                                  |                                                                                                                                                                                                                                                                                                                                                                                                                                                                                |                                                                        |
|-------------------------------|----------------------------|------------------------------------|----------|------------|-------------------|-------------------|----------|-------------------------------------------------------------------------------------------------------------------------------------------------------------------------------------------------------------------------------------|----------------------------------|--------------------------------------------------------------------------------------------------------------------------------------------------------------------------------------------------------------------------------------------------------------------------------------------------------------------------------------------------------------------------------------------------------------------------------------------------------------------------------|------------------------------------------------------------------------|
|                               |                            | NA<br>-mouse,<br>RAG2 KO,<br>NA    |          |            |                   |                   |          |                                                                                                                                                                                                                                     | CD4 T cells (colon, mLN<br>& SP) |                                                                                                                                                                                                                                                                                                                                                                                                                                                                                |                                                                        |
| Parekkadan<br>B,<br>2012 (47) | Adoptive transfer          | Mouse,<br>RAG1 KO,<br>NA           | S        | BM         | IV                | 2x10 <sup>5</sup> | 2        | -WT MSCs<br>-Aire <sup>-/-</sup> MSCs                                                                                                                                                                                               | -D0 &<br>D21                     | -DAI (Body weight)<br>-Colon H/E staining<br>-TNFα (serum)<br>-IL6, IL10, Th1 Tr1, Treg<br>& TNFα (colon)<br><br>-Yes, WT<br>MSCs<br>-No, Aire <sup>-/-</sup><br>MSCs<br><br>-Yes, Poly<br>(I:C)-pretreated<br>MSCs>IFNγ-<br>pretreated<br>MSCs>LPS-<br>pretreated<br>MSCs=TNFα-<br>pretreated<br>MSCs=WT<br>MSCs<br>-Yes, S=X<br>-Yes, 12h & D4<br>-No, WT-<br>MSCs+DAPT,<br>TLR3 <sup>-/-</sup><br>MSCs,Jagged-<br>1 <sup>-/-</sup> MSCs &<br>Notch-1 <sup>-/-</sup><br>MSCs |                                                                        |
| Qiu Y,<br>2017 (46)           | TNBS                       | Mouse,<br>BALBC,<br>NA             | -X<br>-S | UC         | IP                | 1x10 <sup>6</sup> | 1        | -WT MSCs<br>-Poly (I:C)-pretreated<br>MSCs<br>-TNFα-pretreated MSCs<br>-IFNγ-pretreated MSCs<br>-LPS-pretreated MSCs<br>-WT MSCs+DAPT<br>-TLR3 <sup>-/-</sup> MSCs<br>-Jagged-1 <sup>-/-</sup> MSCs<br>-Notch-1 <sup>-/-</sup> MSCs | -2 h<br>-D4                      | -DAI (Body weight, stool<br>consistency & survival)<br>-Colon H/E staining &<br>MPO activity<br>-COX2, IFNγ, IL4, IL6,<br>IL10, IL17A, IL21, IL23,<br>PGE2 & TNFα (colon &<br>serum)<br>-Th1, Th17 & Treg (mLN<br>& SP)                                                                                                                                                                                                                                                        |                                                                        |
| Sala E,<br>2015 (20)          | -10-day DSS cycle<br>-TNBS | -Mouse,<br>C57BL6,<br>F<br>-Mouse, | -S<br>-A | -BM<br>-AD | -IV<br>-IP<br>-SC | 3x10 <sup>6</sup> | -5<br>-4 | -WT MSCs<br>-TSG6 <sup>-/-</sup> MSCs<br>-Encapsulated MSCs<br>-TSG-6                                                                                                                                                               | -D5-D9<br>-D1-D4                 | -DAI (Body weight, stool<br>consistency & rectal<br>bleeding)<br>-Colon length & H/E                                                                                                                                                                                                                                                                                                                                                                                           | -Yes, TSGW>T<br>MSCs=encapsu<br>lated MSCs<br>-No, TSG6 <sup>-/-</sup> |

|                          |                 |                        |   |    |    |                   |    |                                        |    |                                                                                                                                                                                                                                                                                                          |                                                                                                                                                                                                                                                                                                      |      |
|--------------------------|-----------------|------------------------|---|----|----|-------------------|----|----------------------------------------|----|----------------------------------------------------------------------------------------------------------------------------------------------------------------------------------------------------------------------------------------------------------------------------------------------------------|------------------------------------------------------------------------------------------------------------------------------------------------------------------------------------------------------------------------------------------------------------------------------------------------------|------|
|                          |                 | BALB/C,<br>F           |   |    |    |                   |    |                                        |    |                                                                                                                                                                                                                                                                                                          | staining<br>-Arg-II, B220 <sup>+</sup> , CCL22,<br>CD3 <sup>+</sup> , CD11b <sup>+</sup> F4/80 <sup>+</sup> ,<br>CD11 <sup>+</sup> Ly6G <sup>+</sup> Foxp3,<br>HEMO-1, IL10, IL12,<br>TGF-β & TNFα (colon &<br>P)<br>-TSG-6 (serum)<br>-DAI (Body weight, stool<br>consistency & rectal<br>bleeding) | MSCs |
| Song WJ,<br>2017 (42)    | 7-day DSS cycle | Mouse,<br>C57BL6,<br>M | X | AD | IP | 2x10 <sup>6</sup> | 1  | -WT MSCs<br>-TSG6 <sup>-/-</sup> MSCs  | D1 | -Colon H/E staining &<br>IHC (CD11b & CD206)<br>-Arg1, CD206, Fizz1,<br>IFNγ, IL1β IL10, IL17,<br>TNFα & Ym1 (colon)                                                                                                                                                                                     | -Yes, WT<br>MSCs<br>-No, TSG6 <sup>-/-</sup><br>MSCs                                                                                                                                                                                                                                                 |      |
| Song WJ,<br>2018 (41)    | 7-day DSS cycle | Mouse,<br>C57BL6,<br>M | X | AD | IP | 2x10 <sup>6</sup> | -1 | -WT MSCs<br>-TSG6 <sup>-/-</sup> MSCs  | D1 | -DAI (Body weight, stool<br>consistency & rectal<br>bleeding)<br>-Colon H/E staining &<br>IHC (AnxV, CD11b,<br>CD206 & PI)<br>-IL6, IL10 & TNFα (colon)<br>-Body weight<br>-Colon length & H/E<br>staining<br>-colon, mLN, & SP IHC<br>(GFP)<br>-CD4, CD11c, CD51,<br>CD103 & Foxp3 (colon,<br>mLN & SP) | -Yes, WT<br>MSCs<br>-No, TSG6 <sup>-/-</sup><br>MSCs                                                                                                                                                                                                                                                 |      |
| Takeyama H,<br>2017 (49) | DSS             | Mouse,<br>C57BL6,<br>M | S | AD | IP | 2x10 <sup>6</sup> | 1  | -WT MSCs<br>-TSP-1 <sup>-/-</sup> MSCs | D2 |                                                                                                                                                                                                                                                                                                          | -Yes, WT<br>MSCs<br>-No, TSP-1 <sup>-/-</sup><br>MSCs                                                                                                                                                                                                                                                |      |

|                      |                                 |                         |   |    |    |                       |   |                                                                                          |               |                                                                                                                                                                                                                                    |                                                                                             |
|----------------------|---------------------------------|-------------------------|---|----|----|-----------------------|---|------------------------------------------------------------------------------------------|---------------|------------------------------------------------------------------------------------------------------------------------------------------------------------------------------------------------------------------------------------|---------------------------------------------------------------------------------------------|
| Tian J,<br>2020 (57) | 10-day DSS cycle                | Mouse,<br>C57BL6,<br>NA | S | BM | IV | 0.5 x 10 <sup>6</sup> | 1 | -WT MSCs<br>-Pitsopt2-pretreated MSCs<br>-Colivelin-pretreated MSCs<br>-siRNA-BECN1-MSCs | D3            | -DAI (Body weight, stool consistency & rectal bleeding)<br>-Colon length & H/E staining<br>-Th17 & Treg (SP)<br>-BECN1, Corticosterone, IFN $\gamma$ , CD4, CD8, CD9, CD63, CD81, LC3-I, LC3-II, pSTAT3, STAT3 & TNF $\alpha$ (PB) | -Yes, WT MSCs>colivelin-pretreated MSCs<br>-No, Pitsopt2-pretreated MSCs & siRNA-BECN1-MSCs |
| Wang C,<br>2014 (54) | 7-day DSS cycle                 | Mouse,<br>C57BL6,<br>M  | S | BM | IV | 1x10 <sup>6</sup>     | 1 | WT MSCs<br>WT MSCs+SB431542                                                              | D8            | -DAI (Body weight, stool consistency & rectal bleeding)<br>-Colon H/E staining<br>-CD206, F4/80 IFN $\gamma$ , IL6, IL17, pSMAD, pTFG $\beta$ & TNF $\alpha$ (colon)                                                               | -Yes, WT MSCs<br>-No, WT MSCs+SB431542                                                      |
| Wu T,<br>2015 (138)  | 9-day DSS cycle                 | Mouse,<br>C57BL6,<br>M  | X | BM | IV | 1x10 <sup>6</sup>     | 1 | -WT MSCs<br>-mir21-/- MSCs                                                               | D3            | -DAI (Body weight)<br>-Colon length & H/E staining<br>-Treg (colon)                                                                                                                                                                | Yes, Mir21-/- MSCs<br>> WT MSCs                                                             |
| Xu J,<br>2020 (55)   | 3x5-day DSS cycle every 10 days | Mouse,<br>C57BL6,<br>M  | X | E  | IV | 5x10 <sup>5</sup>     | 3 | -WT MSCs<br>-WT MSCs+OSI906<br>-WT MSCs+PPP<br>-IGF-1                                    | D3, D18 & D33 | -DAI (Body weight, stool consistency & rectal bleeding)<br>-Colon H/E staining & IHC (Ki67)<br>-Liver IF (F4/80)<br>-Lung IF (CD31)<br>-ACE, Adiponectin, BLC, CXCL1, CXCL2, IGF1, Igfbp 1, 2 3 & 4, IL5, IL6,                     | -Yes, WT MSCs>IGF-1<br>-No, WT MSCs+OSI906 & WT MSCs+PPP                                    |

|                    |                           |                                        |   |      |    |                     |   |                                                                                       |                       |                                                                                                                                                                                                                                                                                               |                                                                                                                                                                                                             |  |
|--------------------|---------------------------|----------------------------------------|---|------|----|---------------------|---|---------------------------------------------------------------------------------------|-----------------------|-----------------------------------------------------------------------------------------------------------------------------------------------------------------------------------------------------------------------------------------------------------------------------------------------|-------------------------------------------------------------------------------------------------------------------------------------------------------------------------------------------------------------|--|
|                    |                           |                                        |   |      |    |                     |   |                                                                                       |                       |                                                                                                                                                                                                                                                                                               | IL17BR, IL17F, ITAC, MCP1, PDGFaa, pentraxin3, SDF & e-selectin (serum)<br>- AKT, pAKT, PI3K IGF-1R, pIGF-1R $\beta$ , p44/42 MAPK, mTOR, pmTOR, & p70s6 Kinase (colon)<br>-RNA sequencing analysis (colon) |  |
| Yang R, 2018 (45)  | 10-day DSS cycle          | Mouse, C57BL6, NA                      | S | G    | IV | 0.2x10 <sup>6</sup> | 1 | -WT MSCs<br>-NaHS-pretreated MSCs<br>-Cbs <sup>-/-</sup> MSCs                         | Cbs <sup>-/-</sup> D3 | -DAI (Body weight & stool consistency)<br>-Colon H/E staining<br>-Th17 & Treg (colon)                                                                                                                                                                                                         | -Yes, WT MSCs=NaHS-pretreated Cbs <sup>-/-</sup> MSCs<br>-No, Cbs <sup>-/-</sup> MSCs                                                                                                                       |  |
| Yang S, 2021 (39)  | -7-day DSS cycle<br>-TNBS | -Mouse, C57BL6, M<br>-Mouse, BALB/C, M | X | UC   | IP | 200 $\mu$ g         | 1 | -EVs from WT MSCs<br>-siTSG-6 MSCs-EVs<br>-rhTSG-6                                    | -D5<br>-24h           | -DAI (Body weight, stool consistency, rectal bleeding & survival)<br>-Colon length, FITC, H/E & PAS staining, MPO activity & IHC (Claudin-1, Occludin & ZO-1)<br>-Claudin-1, CXCL14, IL-1 $\beta$ , IL-4, IL-11, IL-12 Occludin, TGF- $\beta$ , TSG6 & ZO-1 (colon)<br>-Th2 & Th17 (mLN & SP) | -Yes, EVs from WT MSCs=TSG6<br>-No, siTSG-6 MSCs-EVs                                                                                                                                                        |  |
| Zhang S, 2021 (40) | 7-day DSS cycle           | Mouse, C57BL6, NA                      | X | Musc | IV | 2.5x10 <sup>5</sup> | 1 | -WT MSCs<br>-IFN- $\gamma$ +TNF $\alpha$ -pretreated MSCs<br>-IDO <sup>-/-</sup> MSCs | D2                    | -Body weight<br>-Colon H/E staining<br>-IL6 (serum)                                                                                                                                                                                                                                           | Yes, WT MSCs=TSG6>IDO <sup>-/-</sup> MSCs+TSG6=I                                                                                                                                                            |  |

|                    |                             |                        |   |           |    |                   |          |                          |                                |                                                                                                 |                          |
|--------------------|-----------------------------|------------------------|---|-----------|----|-------------------|----------|--------------------------|--------------------------------|-------------------------------------------------------------------------------------------------|--------------------------|
|                    |                             |                        |   |           |    |                   |          |                          | -TSG6 <sup>-/-</sup> MSCs      |                                                                                                 | DO <sup>-/-</sup>        |
|                    |                             |                        |   |           |    |                   |          |                          | -TSG6                          |                                                                                                 | MSCs+KYN=I               |
|                    |                             |                        |   |           |    |                   |          |                          | - IDO <sup>-/-</sup> MSCs+KYN  |                                                                                                 | DO <sup>-/-</sup>        |
|                    |                             |                        |   |           |    |                   |          |                          | - IDO <sup>-/-</sup> MSCs+KYNA |                                                                                                 | MSCs+KYNA>               |
|                    |                             |                        |   |           |    |                   |          |                          |                                |                                                                                                 | IDO <sup>-/-</sup>       |
|                    |                             |                        |   |           |    |                   |          |                          |                                |                                                                                                 | MSCs=TSG6 <sup>-/-</sup> |
|                    |                             |                        |   |           |    |                   |          |                          |                                |                                                                                                 | MSCs                     |
|                    |                             |                        |   |           |    |                   |          |                          |                                | -DAI (Body weight, stool consistency, rectal bleeding & survival)                               |                          |
|                    |                             |                        |   |           |    |                   |          |                          |                                | -Colon length, H/E & Masson's trichrome staining, MPO activity &                                | -Yes, BM-                |
|                    |                             | -Mouse, C57BL/6,       |   |           |    |                   |          |                          |                                | IHC (IFN-γ, IL-10 & IL-17)                                                                      | MSCs=U-                  |
| Zhou C, 2020 (205) | -2x7-day DSS cycle<br>-TNBS | F<br>-Mouse, BALB/C, M | X | -U<br>-BM | IP | 1x10 <sup>6</sup> | -1<br>-2 | -WT MSCs<br>-siCOX2-MSCs | -D1<br>-D7<br>-D7 & D16        | - GCSF, IFN-γ, IL1β, IL2, IL3, IL6, IL7, IL-10, IL12p70, IL15, IL-17, IL23, PGE2 & TNFα (colon) | MSCs>siCOX2              |
|                    |                             |                        |   |           |    |                   |          |                          |                                | -Th1, Th17, Tr1 & Treg (mLN)                                                                    |                          |
|                    |                             |                        |   |           |    |                   |          |                          |                                | -PGE2 (PB)                                                                                      |                          |

Therapeutic effect; > better than, =similar to; <less than
