# Supplementary material for: Improving the Efficacy of Mesenchymal Stem/Stromal-Based Therapy for Treatment of Inflammatory Bowel Diseases
Source: MDPI journal article supplement (doi:10.3390/biomedicines9111507), 2021-10-20
Supplement: s1 [file s1]

**Supplementary Table S3. Characteristics of MSC-based therapy in less commonly used experimental models of IBD (listed in chronological order)**

| Reference                    | Animal model          | Specie, Strain, Gender | MHC context | Source of MSCs | Administrati on route | MSC Dose              | No. of MSCs infusions | MSCs used                            | Day of infusion (D)       | Parameters analysed for IBD progression                                                                                                                            | Therapeutic effect of MSC therapy |
|------------------------------|-----------------------|------------------------|-------------|----------------|-----------------------|-----------------------|-----------------------|--------------------------------------|---------------------------|--------------------------------------------------------------------------------------------------------------------------------------------------------------------|-----------------------------------|
| Fawzy SA, 2013 (197)         | Acetic acid           | Rat, Albino, M         | S           | BM             | IV                    | 5x10 <sup>5</sup>     | x1                    | WT MSCs                              | 24h                       | -Colon H/E, Alcalin blue & Masson trichrome staining<br>-Collagen & mucin (colon)                                                                                  | Yes                               |
| Mashhour S, 2020 (198)       | Acetic acid           | Rat, Wistar albino, M  | S           | BM             | IP                    | 2x10 <sup>6</sup>     | x1                    | -Non-adherent MSCs<br>-Adherent MSCs | NA                        | -DAI (Stool consistency & rectal bleeding)<br>-Colon H/E staining, MPO & NO activities & lipid peroxidation<br>-IL1 $\beta$ , IL6 & TNF $\alpha$ (colon)           | Yes, adherent MSCs= Non-adherent  |
| Jung WY, 2015 (199)          | 7-day Piroxican cycle | Mouse, IL10 KO, NA     | X           | AD             | IP                    | 2x10 <sup>6</sup>     | x1                    | WT MSCs                              | D7                        | -Body weight<br>-Colon length & H/E staining<br>-IFN $\gamma$ , IL4, IL12, RANTES, TNF $\alpha$ & TLR9 (colon)                                                     | Yes                               |
| Perez-Merino EM, 2015a (200) | Idiopathic IBD        | Dogs, NA, NA           | A           | AD             | IV                    | 2x10 <sup>6</sup> /Kg | x1                    | WT MSCs                              | Histological confirmation | -DAI (Body weight)<br>-Endoscopic analysis<br>-Albumin, cobalamin, CRP & folate CRP (serum)                                                                        | Yes                               |
| Perez-Merino EM, 2015b (201) | Idiopathic IBD        | Dogs, NA, NA           | A           | AD             | IV                    | 2x10 <sup>6</sup> /Kg | x1                    | WT MSCs                              | Histological confirmation | -Body weight<br>-DAI<br>-Albumin, cobalamin, folate & CRP (serum)                                                                                                  | Yes                               |
| Ishioka S, 2020 (202)        | Adoptive transfer     | Mouse, SCID, NA        | X           | AD             | IP                    | 1x10 <sup>5</sup>     | x1                    | WT MSCs                              | D7                        | -DAI (Body weight, stool consistency & rectal bleeding)<br>-Colon length & H/E staining<br>-Colon macroscopic analysis<br>-Colon H/E & Masson's trichrome staining | Yes                               |
| Jung KJ, 2020 (203)          | IL10 KO               | Mouse, IL10 KO, NA     | X           | BM             | IV                    | 5x10 <sup>5</sup>     | x1                    | WT MSCs                              | 1 week                    | -CD4, CD8, Col II, IFN $\gamma$ , IL4, pNF $\kappa$ B/p65 & TNF $\alpha$ (colon)<br>-Catalase, hydrogen peroxide, MDA, SOD1, SOD2 & Superoxide (Small intestine)   | Yes                               |

Therapeutic effect; > better than, =similar to; <less than
