# Supplementary material for: Improving the Efficacy of Mesenchymal Stem/Stromal-Based Therapy for Treatment of Inflammatory Bowel Diseases
Source: MDPI journal article supplement (doi:10.3390/biomedicines9111507), 2021-10-20
Supplement: s1 [file s1]

**Supplementary Table S2. Characteristics of MSC-based therapy in TNBS-induced colitis (listed in chronological order)**

| Reference                     | Animal model | Specie, Strain, Gender | MHC context | Source of MSCs | Administrati on route | MSC Dose                                    | No. of MSCs infusions | MSCs used                          | Day of infusion (D) | Parameters analysed for IBD progression                                                                                                                                                   | Therapeutic effect of MSC therapy |
|-------------------------------|--------------|------------------------|-------------|----------------|-----------------------|---------------------------------------------|-----------------------|------------------------------------|---------------------|-------------------------------------------------------------------------------------------------------------------------------------------------------------------------------------------|-----------------------------------|
| Hayashi Y, 2008 (21)          | TNBS         | Rat, Sprague Dawley, M | S           | BM             | Submucosal            | -1x10 <sup>6</sup><br>-1x10 <sup>7</sup>    | x1                    | WT MSCs                            | D0                  | -Body weight<br>-Colon H/E staining & IHC (Desmin, PKH26, Smad TGFβ, VEGF & Vimentin)                                                                                                     | Yes                               |
| Liang L, 2011 (178)           | TNBS         | Mouse, BALBC, M        | X           | UC             | IV                    | 1x10 <sup>6</sup>                           | x2                    | WT MSCs                            | D0 & D1             | -Body weight<br>-Colon H/E staining & MPO activity<br>- IFNγ, IL6, IL17 & IL23 (colon)<br>- IFNγ, IL17 & RORγT (serum)                                                                    | Yes                               |
| Parekkadan B, 2011 (179)      | TNBS         | Mouse, C57BL6, M       | S           | BM             | -IP<br>-IV            | -1x10 <sup>6</sup><br>-0.25x10 <sup>6</sup> | x1                    | -WT MSCs<br>-MSCs-pretreated CD11b | D0                  | Body weight, stool consistency, rectal bleeding & survival<br>-Colon weight, cellularity & H/E staining<br>-LN Treg, cellularity & weight<br>-Body weight & survival<br>-Endoscopic score | Yes, WT MSCs=MSC-pretreated CD11b |
| Castelo-Branco MT, 2012 (180) | TNBS         | Rat, Wistar, M         | S           | -BM<br>-AD     | IP                    | 2x10 <sup>6</sup>                           | x1                    | WT MSCs                            | D4                  | -Colon H/E & TUNEL staining & collagen fibre density<br>- IL1β, IL10, TGFβ, TNFα & VEGF (colon)<br>-DAI (Body weight, stool consistency & rectal bleeding)                                | Yes                               |
| Chen QQ, 2013 (181)           | TNBS         | Mouse, BALBC, F        | S           | BM             | IV                    | 1x10 <sup>6</sup>                           | x1                    | WT MSCs                            | 48h                 | -Colon length & H/E staining & IHC (Ki67 & Lgr5)<br>-IFNγ, IL2, IL4, IL6, IL10, IL17A & TNFα (serum)<br>-FOXP3, GATA3 IFNγ, IL2, IL4, IL6,                                                | Yes                               |

|                                  |                     |                                                     |    |            |                   |                   |    |         |             |                                                                                                                                                                                                                                                                       |                              |  |
|----------------------------------|---------------------|-----------------------------------------------------|----|------------|-------------------|-------------------|----|---------|-------------|-----------------------------------------------------------------------------------------------------------------------------------------------------------------------------------------------------------------------------------------------------------------------|------------------------------|--|
| Zuo D,<br>2013 (182)             | TNBS                | Rat,<br>Sprague<br>Dawley,<br>F                     | S  | BM         | IV                | 1x10 <sup>6</sup> | x3 | WT MSCs | D0, D3 & D7 | IL10, IL17A, RORγ, T-bet, TGFβ & TNFα (colon)<br>-DAI (Body weight, stool consistency & rectal bleeding)<br>-Colon H/E staining<br>-TNFα (serum)<br>-NFκBp65 & TNFα (colon)                                                                                           | Yes                          |  |
| Gonzalez-Rey<br>E,<br>2014 (151) | -TNBS<br>-4-day DSS | -Mouse,<br>BALB/C,<br>M<br>-Mouse,<br>C57/BL6,<br>M | NA | NA         | -IP<br>-IV<br>-SC | 1x10 <sup>7</sup> | NA | WT MSCs | NA          | -DAI (Body weight & stool consistency)                                                                                                                                                                                                                                | NA                           |  |
| Stavely R,<br>2015a (183)        | TNBS                | Pig,<br>Hartley Guinea,<br>M & F                    | X  | -AD<br>-BM | IR                | 1x10 <sup>6</sup> | x1 | WT MSCs | 3 h         | -Body weight<br>-Colon H/E staining<br>-CD45, CGRPIR, ChAT-IR,nNOS-IR,<br>iNOS-IR, TH-IR & VACH-IR neurons<br>(myenteric plexus)                                                                                                                                      | Yes, AD-<br>MSCs=BM-<br>MSCs |  |
| Stavely R,<br>2015b (184)        | TNBS                | Pig,<br>Hartley Guinea,<br>M & F                    | A  | -AD<br>-BM | IR                | 1x10 <sup>6</sup> | x1 | WT MSCs | 3 h         | -Body weight<br>-Colon H/E staining<br>-CD45, ChAT-IR nNOS-IR & iNOS-IR<br>neurons (myenteric plexus)<br>-Colon H/E staining                                                                                                                                          | Yes                          |  |
| Xing Y,<br>2015 (185)            | TNBS                | Rat,<br>Sprague<br>Dawley,<br>M                     | NA | NA         | IV                | 2x10 <sup>6</sup> | x1 | WT MSCs | 24h         | -APC, atolm1, β-catenin, ces3, Cyclin D<br>cyp4f1, fabp1, fzd3, gcnt3, GSK-3β,<br>ighg, igi, LOC366772, LOC679314,<br>Mcpt1, Mcpt2, C-myc, olfm4, phosphol,<br>pigz, s100g, slc7a15, , slc36a1, slc37a2,<br>rnf125, TCF4, tmem35, Wnt3a, Wnt5,<br>Wnt11 & zp2 (colon) | Yes                          |  |
| Zhang Y,<br>2015 (186)           | TNBS                | Rat,<br>Wistar,                                     | S  | AD         | IV                | 1x10 <sup>7</sup> | x1 | WT MSCs | 24h         | -Colon H/E staining, MDA & MPO<br>activity & IHC (RORγT)                                                                                                                                                                                                              | Yes                          |  |

|                                   |      |                                  |   |            |    |                                                                |    |         |             |                                                                                                                                                                                                                                                                                                                                                                                          |                                                                  |
|-----------------------------------|------|----------------------------------|---|------------|----|----------------------------------------------------------------|----|---------|-------------|------------------------------------------------------------------------------------------------------------------------------------------------------------------------------------------------------------------------------------------------------------------------------------------------------------------------------------------------------------------------------------------|------------------------------------------------------------------|
|                                   |      | M                                |   |            |    |                                                                |    |         |             | -mir1236, RORγT & TNFα (colon)                                                                                                                                                                                                                                                                                                                                                           |                                                                  |
| Zuo D,<br>2015 (187)              | TNBS | Rat,<br>Sprague<br>Dawley,<br>F  | S | BM         | IV | 1x10 <sup>6</sup>                                              | x3 | WT MSCs | D0, D3 & D7 | -DAI (Body weight, stool consistency &<br>rectal bleeding)<br>-Colon H/E staining<br>-Foxp3 & Treg (colon)<br>-DAI (Body weight, stool consistency &<br>rectal bleeding)<br>-Colon length, H/E staining & MPO<br>activity<br>-CD5 <sup>+</sup> B cells, CD8 <sup>+</sup> T cells, Th1, Th2,<br>Th17 & Treg (mLN & SP)<br>-IL-6, IL10, IL-12, IL17, IL-21, IL-23,<br>TGFβ & TNF-α (serum) | Yes                                                              |
| Chao K,<br>2016 (188)             | TNBS | Mouse,<br>BALBC,<br>NA           | X | UC         | IP | 1x10 <sup>6</sup>                                              | x1 | WT MSCs | 2h          |                                                                                                                                                                                                                                                                                                                                                                                          | Yes                                                              |
| Lopez-Santalla<br>M,<br>2017 (18) | TNBS | Mouse,<br>C57BL6,<br>M           | X | AD         | IL | 3.2x10 <sup>5</sup>                                            | x1 | WT MSCs | 1h          | -Body weight<br>-Colon H/E staining                                                                                                                                                                                                                                                                                                                                                      | Yes                                                              |
| Robinson AM,<br>2017 (189)        | TNBS | Pig,<br>Guinea,<br>M & F         | X | BM         | IR | -1x10 <sup>5</sup><br>-1x10 <sup>6</sup><br>-3x10 <sup>6</sup> | x1 | WT MSCs | 3 h         | -Colon H/ staining & IHC (CD45,<br>ChAT & nNOS myenteric neurons)                                                                                                                                                                                                                                                                                                                        | Yes, 3x10 <sup>6</sup> =<br>1x10 <sup>6</sup> >1x10 <sup>5</sup> |
| Xie M,<br>2017 (190)              | TNBS | Mouse,<br>BALBC,<br>NA           | S | -AD<br>-BM | IP | 1x10 <sup>6</sup>                                              | x1 | WT MSCs | 12h         | -DAI (Body weight, stool consistency,<br>rectal bleeding & survival)<br>-Colon length & weight, H/E staining &<br>IHC (IL12, TNFα & VEGF)<br>-IL10, IL12, TNFα & VEGF (colon)                                                                                                                                                                                                            | Yes, AD-<br>MSCs=BM-<br>MSCs                                     |
| De la portilla,<br>2018 (191)     | TNBS | Rat,<br>Wistar,<br>NA            | A | AD         | IR | 2x10 <sup>6</sup>                                              | x1 | WT MSCs | D3          | -DAI (Body weight, stool consistency &<br>rectal bleeding)<br>-Colon H/E staining                                                                                                                                                                                                                                                                                                        | Yes                                                              |
| Fu ZW,<br>2018 (192)              | TNBS | Rat,<br>Sprague-<br>Dawley,<br>M | S | AD         | IL | 2x10 <sup>6</sup>                                              | x1 | WT MSCs | 24 h        | -DAI (Body weight, stool consistency &<br>rectal bleeding)<br>-Colon length weight, H/E staining,<br>MPO activity & IHC (Ki67)<br>-IL1β, TNFα & TSG-6 (colon & serum)                                                                                                                                                                                                                    | Yes                                                              |

|                                        |      |                             |   |    |    |                     |    |                                        |                            |                                                                                                                                                                                                                                                                                                                                                                                                                                                                                                                                                                                                                                                                                                                                                                               |                                              |
|----------------------------------------|------|-----------------------------|---|----|----|---------------------|----|----------------------------------------|----------------------------|-------------------------------------------------------------------------------------------------------------------------------------------------------------------------------------------------------------------------------------------------------------------------------------------------------------------------------------------------------------------------------------------------------------------------------------------------------------------------------------------------------------------------------------------------------------------------------------------------------------------------------------------------------------------------------------------------------------------------------------------------------------------------------|----------------------------------------------|
| Lian L,<br>2018 (36)                   | TNBS | Mouse,<br>BALBC,<br>M       | S | BM | IP | 1x10 <sup>6</sup>   | x1 | WT MSCs                                | -24h before<br>TNBS<br>-D7 | -FOXP3, IL10, IL17A, ROR $\gamma$ , pSTAT3,<br>pSTAT5 & TGF $\beta$ (colon)<br>-Body weight<br>-Colon length & H/E & Masson's<br>trichrome staining, IHC (Fibronectin,<br>Coll, CollIII, IL1, IL6, IL10, IL13 &<br>TFG $\beta$ ) & IF (E-Cadherin & a-SMAD)<br>-pSmad1, pSmad3 & TFG $\beta$ (colon)<br>-DAI (Body weight, stool consistency,<br>rectal bleeding & survival)<br>-Colon H/E staining<br>-Body weight<br>-Colon endoscopy, H/E staining &<br>length<br>-IL10 & Treg (mLN)<br>-DAI (Body weight & survival)<br>-Colon H/E & PAS staining & EPO &<br>MPO activity<br>-Leukocytes, eosinophils, neutrophils &<br>basophils (PB)<br>-IL4 (colon)<br>-Th1, Th17 & Treg, (Colon, mLN & SP)<br>-IL1 $\beta$ , IL4, IL5, IL6 IL12, IL17, IL23 &<br>TNF $\alpha$ (colon) | Yes, D7>24h<br>before TNBS                   |
| Lopez-Santalla<br>M,<br>2018 (22)      | TNBS | Mouse,<br>C57BL6,<br>M      | X | AD | IP | 3.2x10 <sup>5</sup> | x1 | WT MSCs                                | 1h                         | -DAI (Body weight, stool consistency,<br>rectal bleeding & survival)<br>-Colon H/E staining<br>-Body weight<br>-Colon endoscopy, H/E staining &<br>length<br>-IL10 & Treg (mLN)<br>-DAI (Body weight & survival)<br>-Colon H/E & PAS staining & EPO &<br>MPO activity<br>-Leukocytes, eosinophils, neutrophils &<br>basophils (PB)<br>-IL4 (colon)<br>-Th1, Th17 & Treg, (Colon, mLN & SP)<br>-IL1 $\beta$ , IL4, IL5, IL6 IL12, IL17, IL23 &<br>TNF $\alpha$ (colon)                                                                                                                                                                                                                                                                                                         | Yes                                          |
| Martin-Arranz<br>E,<br>2018 (193)      | TNBS | Rat,<br>SD-OFA,<br>M        | X | AD | IR | 1x10 <sup>7</sup>   | x1 | WT MSCs                                | D1                         | -DAI (Body weight, stool consistency,<br>rectal bleeding & survival)<br>-Colon H/E staining<br>-Body weight<br>-Colon endoscopy, H/E staining &<br>length<br>-IL10 & Treg (mLN)<br>-DAI (Body weight & survival)<br>-Colon H/E & PAS staining & EPO &<br>MPO activity<br>-Leukocytes, eosinophils, neutrophils &<br>basophils (PB)<br>-IL4 (colon)<br>-Th1, Th17 & Treg, (Colon, mLN & SP)<br>-IL1 $\beta$ , IL4, IL5, IL6 IL12, IL17, IL23 &<br>TNF $\alpha$ (colon)                                                                                                                                                                                                                                                                                                         | Yes                                          |
| Alves VBF,<br>2019 (26)                | TNBS | Mouse,<br>BALBC,<br>F       | X | AD | NA | 1x10 <sup>6</sup>   | x1 | WT MSCs                                | 24 h                       | -Body weight, stool consistency &<br>survival<br>-Colon H/E staining & length<br>- IL1b, IL6, MIP2 & TNF $\alpha$ (serum)                                                                                                                                                                                                                                                                                                                                                                                                                                                                                                                                                                                                                                                     | Yes                                          |
| Diaz de la<br>Guardia R,<br>2019 (194) | TNBS | Mouse,<br>Bagg albino,<br>M | X | BM | IP | 1x10 <sup>6</sup>   | 1  | -WT MSCs<br>-MSCs from<br>AML patients | 12h                        | -Body weight, stool consistency &<br>survival<br>-Colon H/E staining & length<br>- IL1b, IL6, MIP2 & TNF $\alpha$ (serum)                                                                                                                                                                                                                                                                                                                                                                                                                                                                                                                                                                                                                                                     | Yes, WT<br>MSCs=MSCs<br>from AML<br>patients |
