# Supplementary material for: Improving the Efficacy of Mesenchymal Stem/Stromal-Based Therapy for Treatment of Inflammatory Bowel Diseases
Source: MDPI journal article supplement (doi:10.3390/biomedicines9111507), 2021-10-20
Supplement: s1 [file s1]

**Supplementary Table S6. Ongoing clinical trials in IBD with systemic MSC-based therapy (listed in chronological order)**

| Clinical Trial Identifier | Clinical Phase | Source        | Registration year | Country | IBD patients                                                                    | MHC context | Route of administration | Cells/kg of Body Weight; Number of Doses                                                                         | Number of IBD Patients Enrolled | Follow-Up (Months) | Publication (Year) | Status                  | Included Control Group | Estimation date for completion | Age range (years) |
|---------------------------|----------------|---------------|-------------------|---------|---------------------------------------------------------------------------------|-------------|-------------------------|------------------------------------------------------------------------------------------------------------------|---------------------------------|--------------------|--------------------|-------------------------|------------------------|--------------------------------|-------------------|
| 2011-005966-39            | II             | NA            | 2012              | Belgium | Refractory CD patients                                                          | NA          | IV                      | NA                                                                                                               | 15                              |                    |                    |                         | No                     |                                | 18-75             |
| NCT01510431               | NA             | BM            | 2012              | USA     | Refractory CD patients                                                          | Allogeneic  | IV                      | -2x10 <sup>8</sup> , 4 doses=<br>8x10 <sup>8</sup> every 3 days                                                  | NA                              | NA                 |                    | No longer available     | No                     | 2020                           | 18-70             |
| NCT01914887               | I/IIa          | AD            | 2013              | Spain   | Early diagnosed and 5-ASA-resistant CU patients                                 | Allogeneic  | Local                   | 60x10 <sup>6</sup> , 1 dose                                                                                      | 8                               | 3 months           |                    | Unknown status          | No                     | Unknown status                 | >18               |
| NCT02000362               | I/IIa          | UC            | 2014              | Korea   | Refractory CD patients                                                          | Allogeneic  | IV                      | -5x10 <sup>7</sup> , 1 dose<br>-1x10 <sup>8</sup> , 1 dose                                                       | 24                              | 1 month            |                    | Recruiting              | No                     | Unknown                        | 19-70             |
| NCT02442037               | I/II           | UC            | 2015              | China   | UC patients                                                                     | Allogeneic  | IV                      | 1x10 <sup>6</sup> /Kg, 3 doses=<br>3x10 <sup>6</sup> /Kg                                                         | 30                              | 6 months           |                    | Recruiting              | Yes                    | Unknown                        | 18-65             |
| NCT02580617               | I              | AD            | 2015              | Korea   | Refractory CD patients                                                          | Allogeneic  | IV                      | -5x10 <sup>7</sup> , 1 dose<br>-7.5x10 <sup>7</sup> , 1 dose<br>-10x10 <sup>7</sup> , 1 dose                     | 9                               | 1 month            |                    | Recruiting              | No                     | 2021                           | 18-65             |
| NCT03183661               | I              | AD            | 2016              | Korea   | CD patients                                                                     | Allogeneic  | IV                      | NA                                                                                                               | 9                               | 36 months          |                    | Enrolling by invitation | No                     | 2021                           | 18-65             |
| NCT02926300               | I/IIa          | UC            | 2016              | Korea   | Refractory CD patients                                                          | Allogeneic  | IV                      | NA                                                                                                               | 24                              | 28 months          |                    | Recruiting              | No                     | 2021                           | 19-70             |
| NCT03299413               | I/II           | Wharton Jelly | 2017              | Jordan  | Early diagnosed UC patients                                                     | Allogeneic  | IV                      | 60x10 <sup>6</sup> , 2 doses=<br>120x10 <sup>6</sup>                                                             | 20                              | 6 months           |                    | Active, not recruiting  | No                     | 2019                           | 18-75             |
| NCT03609905               | I/II           | AD            | 2018              | China   | Early diagnosed and 5-ASA, glucocorticoid or azathioprine-resistant CU patients | Allogeneic  | Local                   | 5x10 <sup>7</sup> , 2 doses=<br>10x10 <sup>7</sup>                                                               | 50                              | 2 months           |                    | Recruiting              | No                     | Unknown                        | 18-65             |
| NCT04548583               | Ib/IIa         | BM            | 2020              | USA     | Refractory CD patients                                                          | Allogeneic  | Local                   | -150x10 <sup>6</sup> , 1 dose<br>-300x10 <sup>6</sup> , 1 dose                                                   | 24                              | 24 months          |                    | Recruiting              | Yes                    | 2023                           | 18-75             |
| NCT04312113               | I              | AD            | 2020              | USA     | Refractory UC patients                                                          | Autologous  | IA                      | -15x10 <sup>6</sup> , 1 dose<br>-30x10 <sup>6</sup> , 1 dose                                                     | 20                              | 24 months          |                    | Recruiting              | No                     | 2022                           | 18-65             |
| NCT04543994               | I/II           | BM            | 2020              | USA     | Refractory UC patients                                                          | Allogeneic  | Local                   | -150x10 <sup>6</sup> , 2 doses=<br>300x10 <sup>6</sup><br>-300x10 <sup>6</sup> , 2 doses=<br>600x10 <sup>6</sup> | 24                              | 24 months          |                    | Recruiting              | Yes                    | 2023                           | 18-75             |
