# Supplementary material for: Improving the Efficacy of Mesenchymal Stem/Stromal-Based Therapy for Treatment of Inflammatory Bowel Diseases
Source: MDPI journal article supplement (doi:10.3390/biomedicines9111507), 2021-10-20
Supplement: s1 [file s1]

**Supplementary Table S1. Characteristics of MSC-based therapy in DSS-induced colitis (listed in chronological order)**

| Reference                 | Animal model                                         | Specie, Strain, Gender | MHC context    | Source of MSCs | Administrati on route | MSC Dose                                                       | No. of MSCs infusions | MSCs used | Day of infusion (D) | Parameters analysed for IBD progression                                                                                                                                                                                                                                                                                                                                                                   | Therapeutic effect of MSC therapy         |
|---------------------------|------------------------------------------------------|------------------------|----------------|----------------|-----------------------|----------------------------------------------------------------|-----------------------|-----------|---------------------|-----------------------------------------------------------------------------------------------------------------------------------------------------------------------------------------------------------------------------------------------------------------------------------------------------------------------------------------------------------------------------------------------------------|-------------------------------------------|
| Tanaka F, 2008 (142)      | 7-day DSS cycle                                      | Rat, Lewis, M          | S              | BM             | IV                    | 5x10 <sup>6</sup>                                              | x3                    | WT MSCs   | D0, D2 & D4         | -DAI (Body weight, stool consistency & food & water intake)<br>-Colon length & H/E staining<br>-COX2, bFGF, HGF, IL1 $\beta$ , TNF $\alpha$ & VEGF (colon)                                                                                                                                                                                                                                                | Yes                                       |
| Gonzalez-Rey E, 2009 (34) | -7-day DSS cycle<br>-2x7-day DSS cycle every 10 days | Mouse, C57BL6, NA      | -S<br>-X<br>-A | AD             | IP                    | -1x10 <sup>5</sup><br>-1x10 <sup>6</sup><br>-5x10 <sup>6</sup> | -x1<br>-x2            | WT MSCs   | -D-1<br>-D-7<br>-D7 | -DAI (Body weight, stool consistency & rectal bleeding)<br>-Colon H/E staining<br>-Body weight<br>-Colon length, H/E staining, IHC (Ki67) & tunel analysis<br>-Claudin 2, 12 & 15, IFN $\gamma$ , IL1 $\beta$ , IL10 & TNF $\alpha$ (colon)                                                                                                                                                               | -Yes, D7<br>-Yes, A=S=X<br>-No, D-1 & D-7 |
| Yabana T, 2009 (143)      | -5-day DSS cycle<br>-7-day DSS cycle                 | Rat, Lewis & SD-TG, NA | S              | BM             | IP                    | NA                                                             | x1                    | WT MSCs   | D7                  | -DAI (Body weight, stool consistency & rectal bleeding)<br>-Colon H/E staining & MPO activity<br>-CD4, Foxp3, IFN $\gamma$ , IL6, IL10 & IL17 (colon)<br>-Body weight<br>-Colon H/E & alcian blue staining, IHC (CD31, CD45, PCNA, RM4 & SMA) & Tunnel analysis<br>-EGF, fgf2, Hes1, HGF, IFN $\gamma$ , IGF1, IL1 $\beta$ , IL10, notch1Ptgs2, TFG $\alpha$ , TFG $\beta$ 1, TNF $\alpha$ & VEGF (colon) | Yes                                       |
| Zhang Q, 2009 (144)       | 7-day DSS cycle                                      | Mouse, C57BL6, NA      | X              | -G<br>-BM      | IP                    | 2x10 <sup>6</sup>                                              | x1                    | WT MSCs   | D1                  | -DAI (Body weight, stool consistency & rectal bleeding)<br>-Colon H/E staining & MPO activity<br>-CD4, Foxp3, IFN $\gamma$ , IL6, IL10 & IL17 (colon)<br>-Body weight<br>-Colon H/E & alcian blue staining, IHC (CD31, CD45, PCNA, RM4 & SMA) & Tunnel analysis<br>-EGF, fgf2, Hes1, HGF, IFN $\gamma$ , IGF1, IL1 $\beta$ , IL10, notch1Ptgs2, TFG $\alpha$ , TFG $\beta$ 1, TNF $\alpha$ & VEGF (colon) | Yes                                       |
| Tanaka H, 2011 (145)      | 6-day DSS cycle                                      | Rat, Lewis, M          | S              | BM             | IV                    | 2x10 <sup>4</sup>                                              | x1                    | WT MSCs   | D2                  | -Body weight, stool consistency & rectal bleeding<br>-Colon length & H/E staining                                                                                                                                                                                                                                                                                                                         | Yes                                       |
| He XW, 2012 (146)         | 6-day DSS cycle                                      | Mouse, BALBC, M        | S              | BM             | IV                    | 1x10 <sup>6</sup>                                              | x3                    | WT MSCs   | -D2, D5 & D8        | -Body weight, stool consistency & rectal bleeding<br>-Colon length & H/E staining                                                                                                                                                                                                                                                                                                                         | Yes                                       |

|                                        |                                      |                                                     |    |            |                   |                   |    |         |                    |                                                                                                                                                                                                                                    |                                |          |
|----------------------------------------|--------------------------------------|-----------------------------------------------------|----|------------|-------------------|-------------------|----|---------|--------------------|------------------------------------------------------------------------------------------------------------------------------------------------------------------------------------------------------------------------------------|--------------------------------|----------|
| Li L,<br>2013 (147)                    | 7-day DSS cycle                      | Mouse,<br>C57/BL6,<br>F                             | X  | -UC<br>-BM | IP                | 1x10 <sup>6</sup> | x1 | WT MSCs | D2                 | -TNF $\alpha$ (serum)<br>-IL1 $\beta$ & TNF $\alpha$ (Colon)<br>-Body weight<br>-Colon H/E staining & MPO activity<br>-IL6, IL10, IL17 & TFG $\beta$ (colon)<br>-Th17 & Treg (mLN & SP)                                            | Yes, MSCs=BM-<br>MSCs          | UC-      |
| Xu X,<br>2013 (148)                    | 10-day DSS cycle                     | Mouse,<br>C57BL6/J,<br>F                            | S  | G          | IV                | 2x10 <sup>5</sup> | x1 | WT MSCs | D3                 | -DAI (Body weight, stool consistency & rectal bleeding)<br>-Colon length & H/E & TB staining<br>-Apoptotic CD3, Th17 & Treg (PB)                                                                                                   | Yes, GMSCs><br>GMSCs><br>GMSCs | N-<br>M- |
| Abdel-Salam<br>AG,<br>2014 (149)       | 3x7-day DSS cycles,<br>every 14 days | Mouse,<br>Albino,<br>F                              | S  | BM         | IP                | 5x10 <sup>6</sup> | x1 | WT MSCs | D7                 | -Body weight & stool consistency<br>-Colon H/E staining<br>-ICAM-1, IFN- $\gamma$ , IL-23 & TNF- $\alpha$ (colon)<br>-DAI (Body weight, stool consistency & rectal bleeding)                                                       | Yes                            |          |
| Da costa<br>Goncalves F,<br>2014 (150) | 7-day DSS cycle                      | Mouse,<br>C57/BL6,<br>M                             | S  | AD         | -IP<br>-IV        | 1x10 <sup>6</sup> | x2 | WT MSCs | D1 & D5            | -Colon length & weight & H/E staining & IHC (Tunnel in CD3 T cells)<br>- IFN $\gamma$ , IL2, IL4, IL6, IL17 & TNF $\alpha$ (colon)                                                                                                 | Yes, IV>IP                     |          |
| Gonzalez-Rey<br>E,<br>2014 (151)       | -TNBS<br>-4-day DSS cycle            | -Mouse,<br>BALB/C,<br>M<br>-Mouse,<br>C57/BL6,<br>M | NA | NA         | -IP<br>-IV<br>-SC | 1x10 <sup>7</sup> | NA | WT MSCs | NA                 | -DAI (Body weight & stool consistency)                                                                                                                                                                                             | NA                             |          |
| Lv Y,<br>2014 (152)                    | 7-day DSS cycle                      | Mouse,<br>BALBC,<br>M                               | X  | Mens       | IV                | 1x10 <sup>6</sup> | x4 | WT MSCs | D2, D4, D6 &<br>D8 | -DAI (Body weight, stool consistency & rectal bleeding)<br>-Colon length, H/E staining, MPO activity & IHC (Mac-1)<br>-IL2, IL4, IL10 & TNF $\alpha$ (colon)<br>- CD3+CD25+, CD3+CD8+, IL2, MHCII+CD11c+, TNF $\alpha$ & Treg (SP) | Yes                            |          |

|                           |                 |                                                                |   |                   |            |                                          |            |                                  |                         |                                                                                                                                                                                                                                  |                                        |
|---------------------------|-----------------|----------------------------------------------------------------|---|-------------------|------------|------------------------------------------|------------|----------------------------------|-------------------------|----------------------------------------------------------------------------------------------------------------------------------------------------------------------------------------------------------------------------------|----------------------------------------|
| Wang C,<br>2014 (54)      | 7-day DSS cycle | Mouse,<br>C57BL6,<br>M                                         | S | BM                | IV         | 1x10 <sup>6</sup>                        | 1          | WT MSCs<br>WT MSCs +<br>SB431542 | D8                      | -DAI (Body weight, stool consistency & rectal bleeding)<br>-Colon H/E staining<br>-CD206, F4/80, IFN $\gamma$ , IL6, IL17, pSMAD, pTFG $\beta$ & TNF $\alpha$ (colon)<br>-DAI (Body weight, stool consistency & rectal bleeding) | -Yes, WT MSCs<br>-No, WT MSCs+SB431542 |
| Banerjee A,<br>2015 (153) | 7-day DSS cycle | Mouse,<br>NOD.CB17-<br><i>Prkdc</i> <sup>scid</sup> /JM,<br>NA | X | UC                | IV         | 1x10 <sup>6</sup>                        | x1         | WT MSCs                          | D1                      | -Colon length & H/E staining & IHC (human nuclei) & MPO & catalase activity<br>- BIP, MMP2, MMP9, PERK, PKR-like ER kinase (colon)                                                                                               | Yes                                    |
| Li M,<br>2015 (154)       | 5-day DSS cycl  | Rat,<br>Sprague<br>Dawley,<br>M                                | S | BM                | -IV<br>-IP | -4x10 <sup>6</sup><br>-5x10 <sup>6</sup> | -x1<br>-x3 | WT MSCs                          | -6 h<br>-D0, D2 &<br>D4 | -DAI (Body weight, stool consistency & rectal bleeding)<br>-IHC (GFP MSCs)                                                                                                                                                       | Yes                                    |
| Lin Y,<br>2015 (155)      | 7-day DSS cycle | Mouse,<br>C57/BL6,<br>M                                        | X | UC (WJ)           | IV         | 2x10 <sup>6</sup>                        | x1         | WT MSCs                          | D2                      | -DAI (Body weight, stool consistency & rectal bleeding)<br>-Colon length, H/E staining & IHC (COX2 & iNOS)<br>-IL1 $\beta$ , IFN $\gamma$ , IL6 & TNF $\alpha$ (serum)<br>-Claudin-1, COX2, iNOS, occluding & ZO-1 (colon)       | Yes                                    |
| Liu W,<br>2015 (156)      | 7-day DSS cycle | Mouse,<br>C57/BL6,<br>M                                        | S | BM                | IV         | 1x10 <sup>6</sup>                        | x1         | WT MSCs                          | D7                      | -DAI (Body weight, stool consistency, rectal bleeding & survival)<br>-Colon length & H/E staining<br>-IFN $\gamma$ , IL6, IL17, TGF $\beta$ & TNF $\alpha$ (colon)                                                               | Yes                                    |
| Onishi R,<br>2015 (157)   | 5-day DSS cycle | Rat,<br>Sprague<br>Dawley,<br>M                                | X | Amniotic<br>fluid | IV         | 1x10 <sup>6</sup>                        | x1         | WT MSCs                          | D1                      | -DAI (Body weight, stool consistency & rectal bleeding)<br>-Colon length, H/E staining, MPO activity & IHC (CD3, CD68 & CD163)                                                                                                   | Yes                                    |

|                        |                   |                         |   |           |                   |                   |    |         |             |                                                                                                                                                                                                                                                                          |                         |
|------------------------|-------------------|-------------------------|---|-----------|-------------------|-------------------|----|---------|-------------|--------------------------------------------------------------------------------------------------------------------------------------------------------------------------------------------------------------------------------------------------------------------------|-------------------------|
| Sun T,<br>2015 (158)   | 7-day DSS cycle   | Mouse,<br>BALBC,<br>F   | A | BM        | IV                | 2x10 <sup>5</sup> | x1 | WT MSCs | D7          | -CXCL1, CXCL2, IFN $\gamma$ , IL1 $\beta$ , IL6,<br>MIF & MCP1 & TNF $\alpha$ (colon)<br>-MCP1 (serum)<br>-Colon H/E staining & IHC (E-cadherin)<br>-DAO & D-Lac (serum)<br>-MDA and SOD (colon)<br>-DAI (Body weight, stool consistency,<br>rectal bleeding & survival) | Yes                     |
| Park JS,<br>2015 (159) | 6-day DSS cycle   | Mouse,<br>C57BL6,<br>M  | S | BM        | IV                | 4x10 <sup>5</sup> | x3 | WT MSCs | D1, D3 & D5 | -Colon length, H/E staining, IHC<br>(F4/80, NIMP & TNF $\alpha$ ) & cell death<br>-CD4 <sup>+</sup> , CD8 <sup>+</sup> , IFN $\gamma$ , IL1 $\beta$ , IL4, IL6,<br>IL10, IL17, IL22, IL23, TGF $\beta$ , Th1,<br>Th2, Th17, TNF $\alpha$ & Treg (colon)<br>-Body weight  | Yes                     |
| Lee HJ,<br>2016 (27)   | 3x4-day DSS cycle | Mouse,<br>C57/BL6,<br>F | S | BM        | IV                | 1x10 <sup>7</sup> | x3 | WT-MSCs | D1, D3 & D5 | -Colon length & H/E staining<br>-IL10, TGF $\beta$ & TNF $\alpha$ (colon)<br>-Body weight, stool consistency & rectal<br>bleeding                                                                                                                                        | Yes                     |
| Wang M,<br>2016 (23)   | 5-day DSS cycle   | Mouse,<br>C57BL6,<br>M  | S | BM        | -IP<br>-IV<br>-IR | 1x10 <sup>6</sup> | x1 | WT-MSCs | D5          | -Colon length, MPO activity, H/E<br>staining & IHC (collagen, Foxp3 &<br>Ki67)<br>-IL10 & TNF $\alpha$ (colon)                                                                                                                                                           | Yes, IP>IR>IV           |
| Wang X,<br>2016 (160)  | 6-day DSS cycle   | Mouse,<br>NA,<br>NA     | X | -BM<br>-E | IP                | 1x10 <sup>6</sup> | x2 | WT-MSCs | D2 & D3     | -Body weight, stool consistency & rectal<br>bleeding<br>-Colon length & H/E staining                                                                                                                                                                                     | Yes, BM-<br>MSCs=T-MSCs |
| Mao F,<br>2017b (161)  | 10-day DSS cycle  | Mouse,<br>KM,<br>M      | X | UC        | IV                | 1x10 <sup>6</sup> | x3 | WT MSCs | D3, D6 & D9 | -Body weight<br>-Colon length, H/E staining & IHC<br>(CD206 & PCNA)<br>-SP H/E staining & IHC (CD206)<br>-IL1 $\beta$ , IL6, IL10, IP10, 15lox STAT3 &<br>TNF $\alpha$ (colon & SP)                                                                                      | Yes                     |

|                             |                   |                          |   |    |    |                   |            |                                         |                                    |                                                                                                                                                                                                                                            |                                                        |
|-----------------------------|-------------------|--------------------------|---|----|----|-------------------|------------|-----------------------------------------|------------------------------------|--------------------------------------------------------------------------------------------------------------------------------------------------------------------------------------------------------------------------------------------|--------------------------------------------------------|
| Yu Y,<br>2017b (162)        | 5-day DSS cycle   | Mouse,<br>C57BL6,<br>M   | X | T  | IP | 1x10 <sup>6</sup> | -x2<br>-x4 | WT-MSCs                                 | -D6 & D16<br>-D6, D9, D12<br>& D16 | -DAI (Body weight, stool consistency,<br>rectal bleeding & survival)<br>-Colon length & H/E staining<br>-IL1 $\beta$ , IL6, IL10, IL11, IL13 IL17 &<br>TNF $\alpha$ (colon)                                                                | Yes, 6, 9, 12 &<br>16> 6 & 16                          |
| An JH,<br>2018 (163)        | 7-day DSS cycle   | Mouse,<br>C57/BL6,<br>M  | X | AD | IP | 2x10 <sup>6</sup> | x1         | WT MSCs                                 | D1                                 | -DAI (Body weight, stool consistency,<br>rectal bleeding & general activity)<br>-Colon length & H/E staining<br>- IFN $\gamma$ , IL1 $\beta$ , IL4, IL6, IL10, TNF $\alpha$ &<br>Treg (colon)                                              | Yes                                                    |
| De Aguiar CF,<br>2018 (164) | 7-day DSS cycle   | Mouse,<br>C57/BL6,<br>M  | S | AD | IP | 1x10 <sup>6</sup> | x2         | WT MSCs                                 | D1 & D5                            | -DAI (Body weight, stool consistency,<br>rectal bleeding & general activity)<br>-Colon length & H/E staining & IHC<br>(CD11b)<br>-Arg1, IFN $\gamma$ , IL6, IL10, MCP1, TNF $\alpha$ &<br>ZO-1 (colon)<br>-DCs & Macrophages (colon & mLN) | Yes                                                    |
| Jo H,<br>2018 (165)         | 2x5-day DSS cycle | Mouse,<br>C57/BL6,<br>F  | S | BM | IP | 1x10 <sup>6</sup> | x2         | -WT-MSCs<br>-MSCs-primed<br>DCs<br>-DCs | D6 & D16                           | -Body weight & survival<br>-Colon length, H/E staining & IHC<br>(Foxp3)<br>-Foxp3, IFN $\gamma$ , IL6, IL10, STAT3,<br>pSTAT3, TGF $\beta$ & TNF $\alpha$ (colon)                                                                          | -Yes, MSCs<br>pretreated<br>DCs>WT<br>MSCs<br>-No, DCs |
| Nikolic A,<br>2018 (166)    | 7-day DSS cycle   | Mouse,<br>C57BL/6,<br>NA | S | BM | IP | 2x10 <sup>6</sup> | x3         | -WT MSCs<br>-MSCs-primed<br>DCs<br>-DCs | -12h<br>-D1 & D2                   | -DAI (Body weight, stool consistency &<br>rectal bleeding)<br>-Colon H/E staining<br>-Gal-3, HGF, IL-1 $\beta$ , IL-6, IL12 & PGE2<br>(serum)                                                                                              | Yes, WT MSCs<br>& MSCs-<br>primed DCs                  |
| Niu GC,<br>2018 (167)       | 6x5-day DSS cycle | Mouse,<br>C57BL6,<br>M   | X | UC | IV | 1x10 <sup>6</sup> | x1         | WT MSCs                                 | NA                                 | -DAI (Body weight, stool consistency,<br>rectal bleeding & survival)<br>-Colon length, H/E & MT staining &<br>IHC (IFN $\gamma$ , IL1 $\beta$ , IL17A, NF $\kappa$ B, TLR4,<br>TNF $\alpha$ & TRAF6)                                       | Yes                                                    |

|                            |                 |                              |   |                          |    |                   |    |                                        |              |                                                                                                                                                                                                                                                                                                                                                                                                                                                                                                                                                                                                                                                                                                                                                     |                                                      |
|----------------------------|-----------------|------------------------------|---|--------------------------|----|-------------------|----|----------------------------------------|--------------|-----------------------------------------------------------------------------------------------------------------------------------------------------------------------------------------------------------------------------------------------------------------------------------------------------------------------------------------------------------------------------------------------------------------------------------------------------------------------------------------------------------------------------------------------------------------------------------------------------------------------------------------------------------------------------------------------------------------------------------------------------|------------------------------------------------------|
| Soontarak S,<br>2018 (168) | DSS             | Mouse,<br>CD1,<br>F          | S | AD                       | IV | 1x10 <sup>6</sup> | x3 | -WT MSCs<br>-MSCs derived<br>from iPSs | D10, 13 & 16 | -ALB, ALT & AST (serum)<br>-IFN $\gamma$ , IL1 $\beta$ , IL17A, NF $\kappa$ B, TLR4,<br>TNF $\alpha$ & TRAF6 (liver)<br>-DAI (Body weight, stool consistency &<br>rectal bleeding)<br>-Colon H/E staining & IF (CD31, KI67<br>& Lgr5)<br>-CD3, Cd4, CD11b, CD103, Foxp3 &<br>F4/80 (colon, mLN & SP)<br>-DAI (Body weight, stool consistency,<br>rectal bleeding & survival)<br>-Colon length & H/E staining<br>-IL6, IL10 & TNF $\alpha$ (colon)<br>- CD3, CD4, CD8, CD19, CD25, CD83,<br>CD138, Foxp3, IFN- $\gamma$ , IL10 & IL-17<br>(SP)<br>-Bregs (mLN, PC & SP)<br>-DAI (Body weight, stool consistency,<br>general activity & survival)<br>-Colon length & H/E staining<br>-Eotaxin, GRO- $\alpha$ , IL17A, MIP1 $\alpha$ &<br>MIP2 (serum) | Yes, WT<br>MSCs=MSCs<br>from IPSs                    |
| Xu X,<br>2018 (169)        | 7-day DSS cycle | Mouse,<br>BALB/C,<br>M       | X | Mens                     | IV | 1x10 <sup>6</sup> | x3 | WT MSCs                                | D2, D5 & D8  | -DAI (Body weight, stool consistency,<br>general activity & survival)<br>-Colon length & H/E staining<br>-IL6, IL10 & TNF $\alpha$ (colon)<br>- CD3, CD4, CD8, CD19, CD25, CD83,<br>CD138, Foxp3, IFN- $\gamma$ , IL10 & IL-17<br>(SP)<br>-Bregs (mLN, PC & SP)<br>-DAI (Body weight, stool consistency,<br>general activity & survival)<br>-Colon length & H/E staining<br>-Eotaxin, GRO- $\alpha$ , IL17A, MIP1 $\alpha$ &<br>MIP2 (serum)                                                                                                                                                                                                                                                                                                        | Yes                                                  |
| Chang YL,<br>2019 (170)    | 6-day DSS cycle | Mouse,<br>C57BL/6JNarl,<br>M | X | UC                       | IP | 2x10 <sup>6</sup> | x1 | WT MSCs                                | D1           | -DAI (Body weight, stool consistency,<br>general activity & survival)<br>-Colon length & H/E staining<br>-Eotaxin, GRO- $\alpha$ , IL17A, MIP1 $\alpha$ &<br>MIP2 (serum)                                                                                                                                                                                                                                                                                                                                                                                                                                                                                                                                                                           | Yes                                                  |
| Kagia A,<br>2019 (171)     | 3-day DSS cycle | Mouse,<br>C57BL/6,<br>F      | X | -BM<br>-UC<br>-E<br>-iPS | IP | 5x10 <sup>6</sup> | x1 | WT MSCs                                | D3           | -Body weight & survival<br>-Colon aspect & H/E staining                                                                                                                                                                                                                                                                                                                                                                                                                                                                                                                                                                                                                                                                                             | Yes, BM-MSCs<br>& UC-MSCs><br>EC-MSCs &<br>iPSC-MSCs |
| Kang I,<br>2019 (172))     | 7-day DSS cycle | Mouse,<br>C57/BL6,<br>M      | X | UC                       | IP | NA                | x1 | WT MSCs                                | D1           | -DAI (Body weight, stool consistency,<br>rectal bleeding, general activity &<br>survival)<br>-Colon length, H/E staining, MPO<br>activity & IHC (ARS & WRS)<br>-IFN $\gamma$ , IL6, IL12 & TNF $\alpha$ (serum)                                                                                                                                                                                                                                                                                                                                                                                                                                                                                                                                     | Yes                                                  |

|                                |                                        |                                                        |                |    |            |                                          |            |             |                          |                                                                                                                                                                                                                                                                              |                                                                                                              |
|--------------------------------|----------------------------------------|--------------------------------------------------------|----------------|----|------------|------------------------------------------|------------|-------------|--------------------------|------------------------------------------------------------------------------------------------------------------------------------------------------------------------------------------------------------------------------------------------------------------------------|--------------------------------------------------------------------------------------------------------------|
| Kawata Y,<br>2019 (32)         | 7-day DSS cycle                        | Mouse,<br>C57/BL6,<br>M                                | X              | AD | -IP<br>-IV | 1x10 <sup>6</sup>                        | x1         | WT MSCs     | -D3<br>-D11              | -DAI (Body weight, stool consistency & rectal bleeding)<br>-Colon length, H/E staining & IHC (Treg)<br>- CD206, Fizz1, EGF, HGF, IL4, IL6, IL10, IL17, iNOS, PGE2, TFGβ, TNFα, TSG6, VEGF & Ym1 (colon)<br>-DAI (Body weight, stool consistency, rectal bleeding & survival) | -Yes, D3<br>-No, D11                                                                                         |
| Pan XH,<br>2019 (173)          | 5x4-day DSS cycle,<br>every 3 days     | Mouse,<br>C57BL6,<br>M                                 | -S<br>-X       | UC | -IP<br>-IV | -5x10 <sup>6</sup><br>-1x10 <sup>7</sup> | x3         | WT MSCs     | D1, D3 & D5              | -Colon length, H/E staining & IHC (CD4 & F4/80)<br>-IL6 & TNFα (serum)<br>-Claudin-1, IL6, LC3AB, occludin, VEGF & VEHRF1 (Colon)<br>-DAI (Body weight, stool consistency, rectal bleeding & general activity)                                                               | -Yes, IP>IV<br>-Yes, X>S                                                                                     |
| Li Y,<br>2020b (174)           | -7-day DSS cycle<br>-2x7-day DSS cycle | Mouse,<br>C57/BL6,<br>F                                | X              | UC | IP         | 2x10 <sup>6</sup>                        | x2         | WT MSCs     | D2&D4                    | -Colon H/E staining, MPO activity & IHC (CD4 & Foxp3)<br>-CD4 & Treg (colon, mLN & SP)                                                                                                                                                                                       | Yes                                                                                                          |
| Lopez-Santalla M,<br>2020 (25) | 2x7-day DSS cycle,<br>every 3 months   | -Mouse,<br>C57BL6,<br>M & F<br>-Mouse, RAG-1,<br>M & F | -X<br>-S<br>-A | AD | IP         | 3-5x10 <sup>6</sup>                      | x1         | WT MSCs     | -D3<br>-D4<br>-D5<br>-D6 | -DAI (Body weight, stool consistency, rectal bleeding & survival)<br>-Colon H/E staining<br>-Myeloid cells (BM, colon P, PB & SP)                                                                                                                                            | -Yes, X=S=A<br>-Yes,<br>D3=D4=D5=D6<br>-Yes, RAG-1>C57BL6<br>-Y, 1 <sup>st</sup> =2 <sup>nd</sup> DSS cycles |
| Nishikawa T,<br>2020 (175)     | 5-day DSS cycle                        | Mouse,<br>C57BL/6,<br>M                                | S              | AD | IP         | 1x10 <sup>6</sup>                        | -x1<br>-x3 | MSC lysates | -D2<br>-D2, D3 & D4      | -DAI (Body weight & survival)<br>-Colon length, H/E staining & MPO activity<br>-Claudin 1 & 2, IFNγ, IL-1β, IL6, IL17, KC, iNOS, PAI-1, occluding & TNFα                                                                                                                     | Yes, MSC lysates                                                                                             |

|                                    |                 |                         |   |            |    |                   |    |         |             |                                                                                                                               |     |
|------------------------------------|-----------------|-------------------------|---|------------|----|-------------------|----|---------|-------------|-------------------------------------------------------------------------------------------------------------------------------|-----|
|                                    |                 |                         |   |            |    |                   |    |         |             | (colon)                                                                                                                       |     |
|                                    |                 |                         |   |            |    |                   |    |         |             | -DAI (Body weight, stool consistency & rectal bleeding)                                                                       |     |
|                                    |                 |                         |   |            |    |                   |    |         |             | -Colon & SP length & H/E staining                                                                                             |     |
| Wang G,<br>2020 (176)              | DSS             | Mouse,<br>C57BL6,<br>NA | X | UC         | IP | 3x10 <sup>6</sup> | x3 | WT MSCs | D3, D6 & D9 | -Colon IHC (CCL2, CCL3, CD11b, CXCR4, FAS, ICAM1 & VEGF)                                                                      | Yes |
|                                    |                 |                         |   |            |    |                   |    |         |             | -CCL2, CCL3, CD11b, CXCR4, pERK, ERK, FAS, IVAM1, IL1 $\beta$ , IL6, IL8, IL10, pNF $\kappa$ B, TNF $\alpha$ & VEGF & (colon) |     |
|                                    |                 |                         |   |            |    |                   |    |         |             | -DAI (Body weight, stool consistency & rectal bleeding)                                                                       |     |
| Hidalgo-García<br>L,<br>2021 (177) | 4-day DSS cycle | Mouse,<br>C57/BL6,<br>M | X | Intestinal | IP | 1x10 <sup>6</sup> | x1 | WT MSCs | D1          | -Colon length & weight, H/E staining, IHC (Villin & Zo-1) & TUNEL assay                                                       | Yes |
|                                    |                 |                         |   |            |    |                   |    |         |             | -ArgI, ICAM, IL-6, IL-12, iNOS & TNF- $\alpha$ (Colon)                                                                        |     |

Therapeutic effect; > better than, =similar to; <less than
